# Supplementary material for: Conversion of CO2 into cyclic carbonate catalyzed by an N-doped mesoporous carbon catalyst
Source: Royal Society of Chemistry journal article supplement (doi:10.1039/d1re00164g), 2021-01-01
Supplement: d1re00164g1.pdf [file d1re00164g1.pdf]

## Supporting Information

### **Conversion of CO<sub>2</sub> into Cyclic Carbonate Catalyzed by N-Doped Mesoporous Carbon Catalyst**

Dan Liu<sup>ab</sup>, Jinxia Fu<sup>c</sup>, Kuo Zhou<sup>a</sup>, Shimin Kang<sup>\*a</sup>, Zhuodi Cai<sup>a</sup>, Yongjun Xu<sup>\*a</sup> and Peigao Duan<sup>b</sup>

<sup>a</sup>Engineering Research Center of None-food Biomass Efficient Pyrolysis and Utilization Technology of Guangdong Higher Education Institutes, Guangdong Provincial Key Laboratory of Distributed Energy Systems, Dongguan University of Technology, Dongguan, Guangdong 523808, China

<sup>b</sup> School of Chemical Engineering and Technology, Xi'an Jiaotong University, Xi'an 710049, P. R. China

<sup>c</sup> Hawaii Natural Energy Institute, University of Hawaii at Manoa, Honolulu, HI, 96822, USA

\*Corresponding author.

E-mail: kangshimin@dgut.edu.cn; xuyj@dgut.edu.cn.

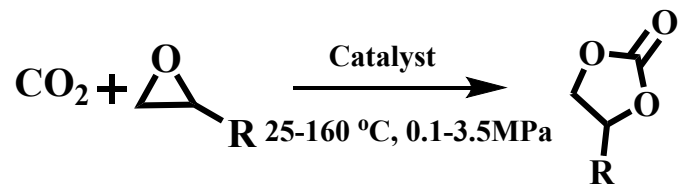

Scheme S1. The cycloaddition of CO<sub>2</sub> with epoxides.

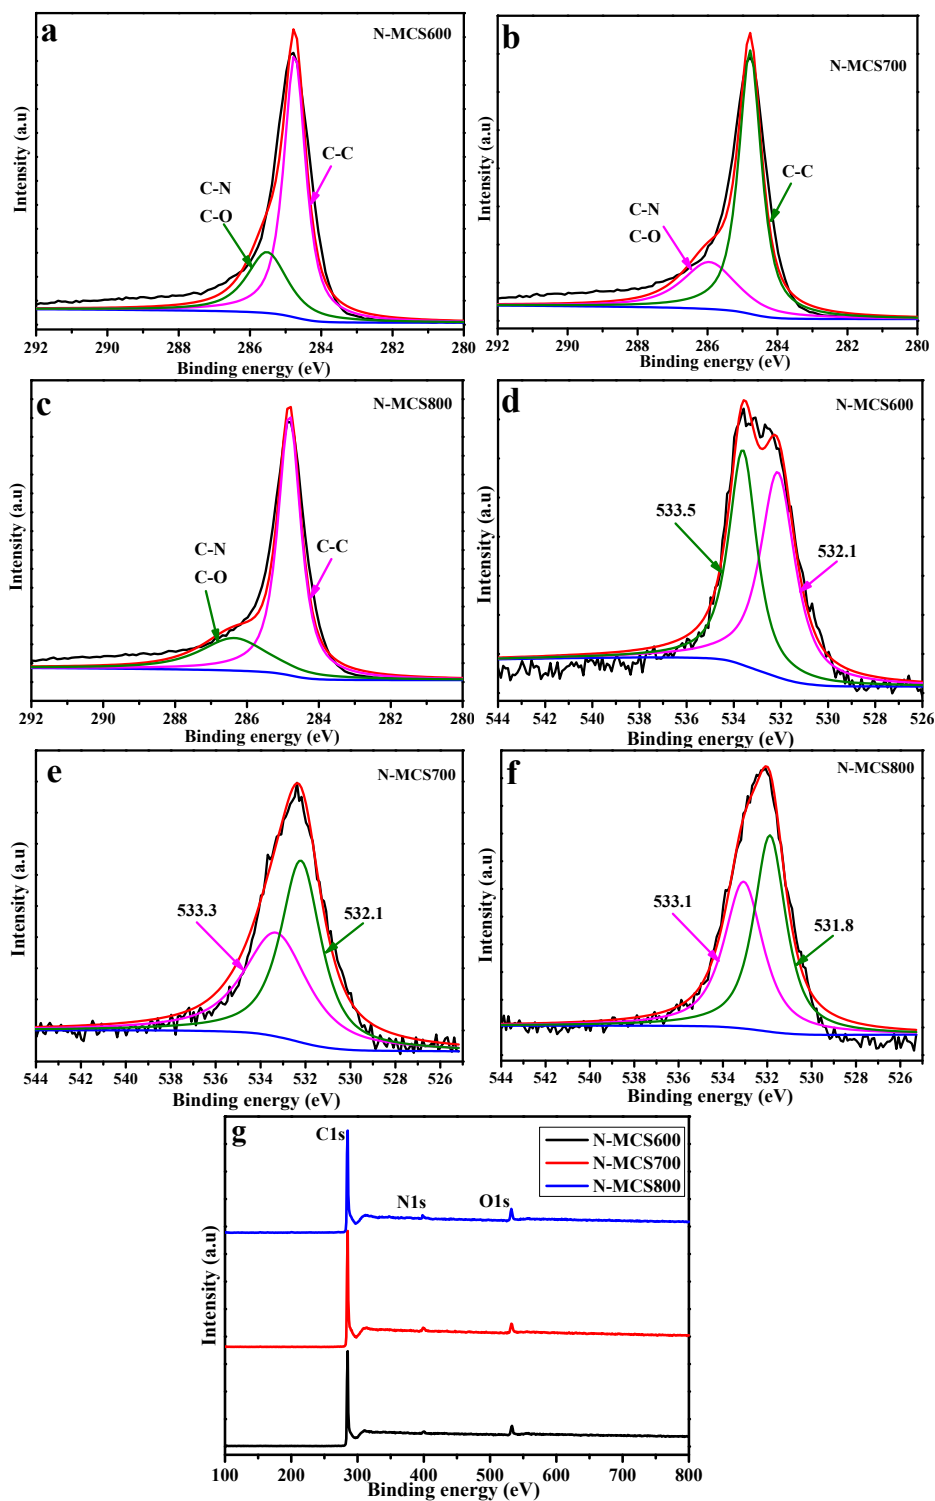

Figure S1. The C1s (a-c), O1s (d-f) and XPS survey spectra (g) of different N-MCS samples.

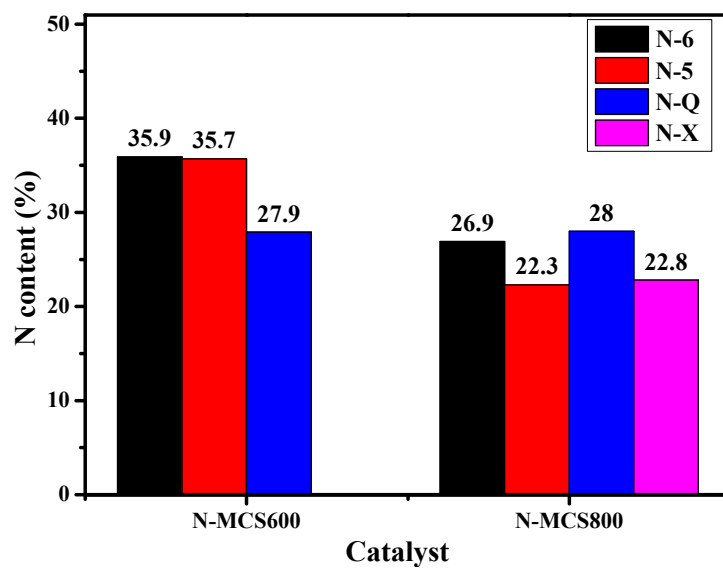

Figure S2. The N percentage composition of different N-MCS materials measured by XPS.

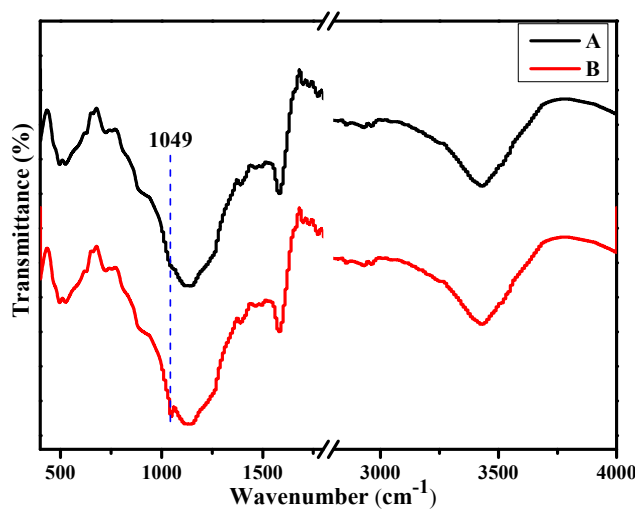

Figure S3. FT-IR spectra of N-MCS800 before (A) and after (B) interaction with CO<sub>2</sub>.

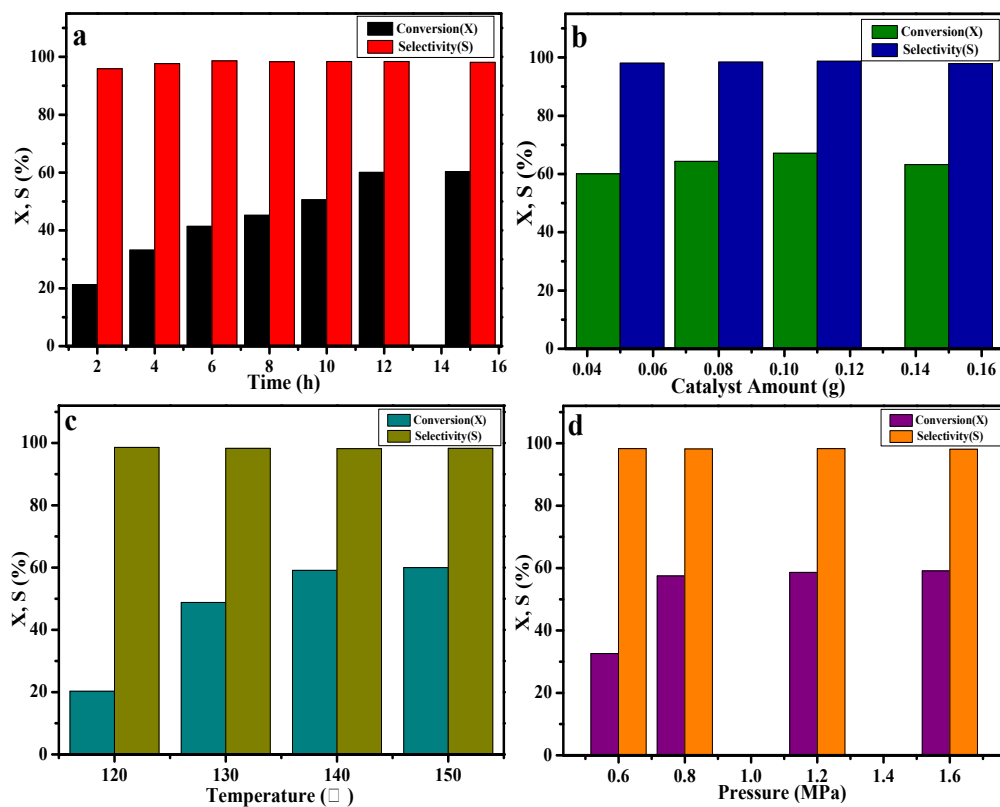

Figure S4. Impacts of reaction conditions on the cycloaddition of CO<sub>2</sub> with ECH: (a) reaction time, (b) catalyst amount, (c) reaction temperature, (d) reaction pressure.

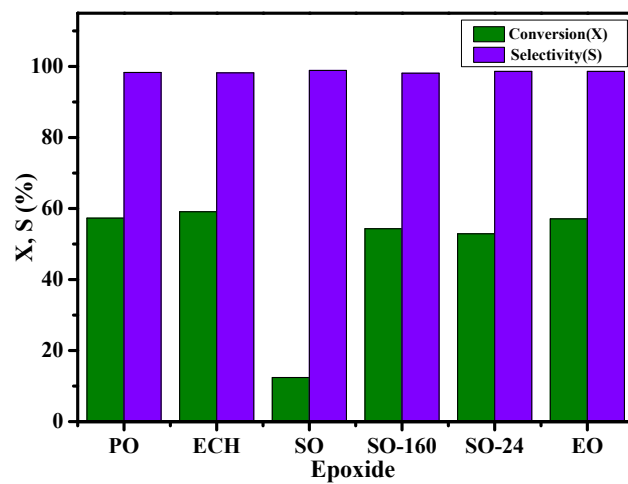

Figure S5. Coupling of CO<sub>2</sub> and various epoxides.

SO-160: The reaction temperature is 160 °C. SO-24: The reaction time is 24 h.

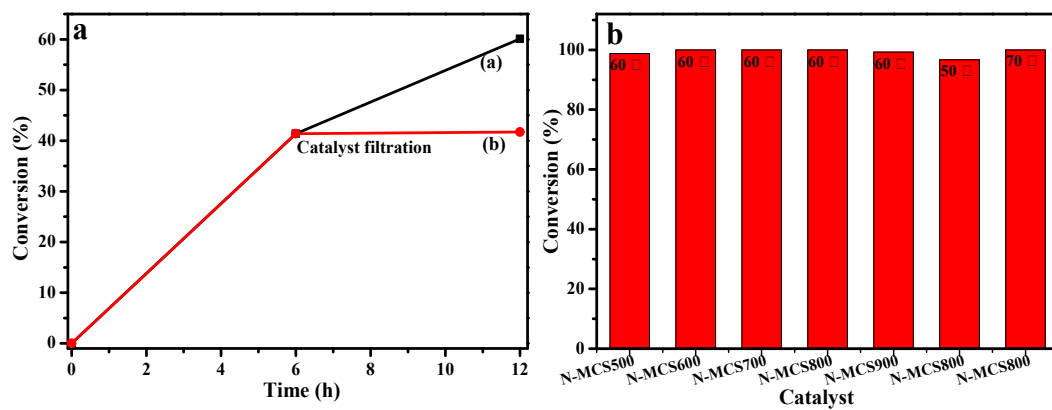

Figure S6. (a) Cycloaddition of CO<sub>2</sub> with ECH over (a) N-CMS800 and (b) in the filtrate solution (catalyst filtered off after 6 h), (b) Knoevenagel condensation reaction.

Table S1. Texture parameters of various N-MCS materials.

| Entry | Catalyst            | $S_{\text{BET}}$<br>( $\text{m}^2\text{g}^{-1}$ ) | $V_{\text{Meso}}$<br>( $\text{cm}^3\text{g}^{-1}$ ) | $I_{\text{D}}/I_{\text{G}}$ | Basic amount ( $\text{mmol}\cdot\text{g}^{-1}$ ) |                             |               |
|-------|---------------------|---------------------------------------------------|-----------------------------------------------------|-----------------------------|--------------------------------------------------|-----------------------------|---------------|
|       |                     |                                                   |                                                     |                             | Weak<br>base <sup>a</sup>                        | Strong<br>base <sup>b</sup> | Total<br>base |
| 1     | N-MCS600            | 599.5                                             | 0.89                                                | 0.88                        | 0.47                                             | 0.59                        | 1.06          |
| 2     | N-MCS700            | 634.7                                             | 0.95                                                | 0.95                        | 0.49                                             | 0.64                        | 1.13          |
| 3     | N-MCS800            | 1341.9                                            | 1.47                                                | 1.00                        | 0.70                                             | 0.89                        | 1.59          |
| 4     | Reused N-<br>MCS800 | 1298.7                                            | 1.44                                                | -                           | -                                                | -                           | -             |

<sup>a</sup> Measured at 50-250 °C; <sup>b</sup> Measured at 250-600 °C.



Table S2. The comparison of CN catalysts for the cycloaddition of CO<sub>2</sub> and ECH.

| Entry | Catalyst                                                         | Pres./<br>MPa | Temp./<br>°C | Time/<br>h | Yield/<br>%              | Ref.      |
|-------|------------------------------------------------------------------|---------------|--------------|------------|--------------------------|-----------|
| 1     | N-MCS800                                                         | 0.8           | 140          | 12         | 58.2                     | This work |
| 2     | N-MCS800 <sup>a</sup>                                            | 0.8           | 100          | 12         | 99.1                     | This work |
| 3     | UF-MCN <sup>b</sup>                                              | 0.8           | 100          | 10         | 34.0                     | [1]       |
| 4     | prop-Br/NOMC-450-140 <sup>c</sup>                                | 2.5           | 150          | 10         | 65.0                     | [2]       |
| 5     | ZnBr <sub>2</sub> /g-C <sub>3</sub> N <sub>4</sub> <sup>d</sup>  | 2.0           | 140          | 6          | 52.0                     | [3]       |
| 6     | u-g-C <sub>3</sub> N <sub>4</sub> -480 <sup>e</sup>              | 2.0           | 130          | 4          | 23.7                     | [4]       |
| 7     | ZnBr <sub>2</sub> /mp-C <sub>3</sub> N <sub>4</sub> <sup>f</sup> | 2.5           | 140          | 6          | 10.4 (96.8) <sup>o</sup> | [5]       |
| 8     | MS-CN <sup>g</sup>                                               | 0.8           | 140          | 10         | 30.6                     | [6]       |
| 9     | g-C <sub>3</sub> N <sub>4</sub> /SBA-15 <sup>h</sup>             | 3.5           | 150          | 1.5        | 28.8 (96.1) <sup>o</sup> | [7]       |
| 10    | Zn-C <sub>3</sub> N <sub>4</sub> <sup>i</sup>                    | 2.0           | 130          | 5          | 7.0 (91.0) <sup>o</sup>  | [8]       |
| 11    | g-C <sub>3</sub> N <sub>4</sub> /TBAB <sup>j</sup>               | 3.5           | 150          | 1.5        | 28.8 (94.5) <sup>o</sup> | [9]       |
| 12    | g-C <sub>3</sub> N <sub>4</sub> -450-NaOH <sup>k</sup>           | 2.0           | 140          | 6          | 3.7 (79.2) <sup>o</sup>  | [10]      |
| 13    | P-C <sub>3</sub> N <sub>4</sub> -2 <sup>l</sup>                  | 2.0           | 100          | 4          | 20.8 (99.8) <sup>o</sup> | [11]      |

<sup>a</sup>: ZnBr<sub>2</sub> was used as co-catalyst. <sup>b</sup>: prepared using disk-shaped 2D hexagonal mesoporous silica as a hard template, urea and formaldehyde resin as precursors. <sup>c</sup>: prepared through a soft templating method and then utilized as supports to immobilize alkyl bromide. <sup>d</sup>: ZnBr<sub>2</sub> supported on a g-C<sub>3</sub>N<sub>4</sub> material. <sup>e</sup>: prepared using urea as a starting material without addition of any template. <sup>f</sup>: ZnBr<sub>2</sub> supported on a mp-C<sub>3</sub>N<sub>4</sub> material. <sup>g</sup>: prepared using disk-shaped 2D hexagonal mesoporous silica as a hard template and melamine as a precursor. <sup>h</sup>: prepared using SBA-15 as a catalytic support and dicyandiamide as a precursor through a chemical vapor deposition method. Zn<sup>2+</sup> was further doped into g-C<sub>3</sub>N<sub>4</sub>/SBA-15 as an additive. <sup>i</sup>: Zn modified carbon nitride catalyst and KI was used as co-catalyst. <sup>j</sup>: Tetrabutylammonium bromide (TBAB) was used as co-catalyst. <sup>k</sup>: synthesized using guanidine hydrochloride as a precursor treated with NaOH and ZnI<sub>2</sub> was used as co-catalyst. <sup>l</sup>: prepared by direct thermolysis of melamine, hexachlorotriphosphazene and Bu<sub>4</sub>NBr was used as co-catalyst. <sup>o</sup>: the values in brackets are obtained in the presence of co-catalyst.

- [1] L. Y. Zhao, X. L. Dong, J. Y. Chen, A. H. Lu, *Chem. Eur. J.* 2020, 26, 2041-2050.
- [2] D. Ma, H. Zheng, H. M. Wan, Y. Chen, J. Xu, B. Xue, *Micropor. Mesopor. Mater.*, 2018, 258, 244-250.
- [3] J. Xu, Y. L. Gan, P. Hu, H. Zheng, B. Xue, *Catal. Sci. Technol.*, 2018, 8, 5582-5593.
- [4] Q. Su, J. Sun, J. Wang, Z. Yang, W. Cheng, S. Zhang, *Catal. Sci. Technol.*, 2014, 4, 1556-1562.
- [5] J. Xu, F. Wu, Q. Jiang, J. K. Shang, Y. X. Li, *J. Mol. Catal. A*, 2015, 403, 77-83.
- [6] M. B.h Ansari, B. H. Min, Y. H. Mo, S. E. Park, *Green Chem.*, 2011, 13, 1416-1422.
- [7] Z. Huang, F. Li, B. Chen, T. Lu, Y. Yuan, G. Yuan, *Appl. Catal. B Environ.*, 2013, 136-137, 269-277.
- [8] X. W, M. S. Liu, L. Y, J. W. Lan, Y. L. Chen, J. M. Sun, *ChemistrySelect*, 2018, 3, 4101-4109.
- [9] T. Biswas, V. Mahalingam, *New J. Chem.*, 2017, 41, 14839-14842.
- [10] J. Xu, J. K. Shang, Q. Jiang, Y. Wang, Y. X. Li, *RSC Adv.*, 2016, 6, 55382-55392.
- [11] D. H. Lan, H. T. Wang, L. Chen, C. T. Au, S. F. Yin, *Carbon*, 2016, 100, 81-89
